# Supplementary material for: Ets-1 is a critical regulator of Ang II-mediated vascular inflammation and remodeling
Source: JCI journal article supplement (doi:10.1172/jci24403), 2005-08-25
Supplement: sd1 [file 1]

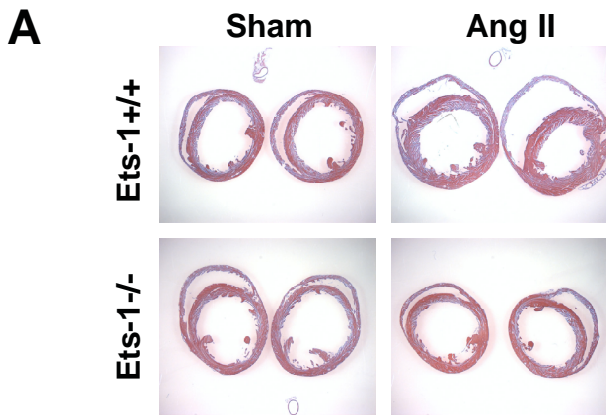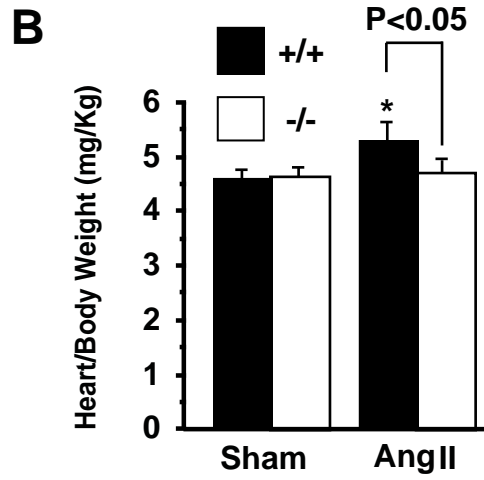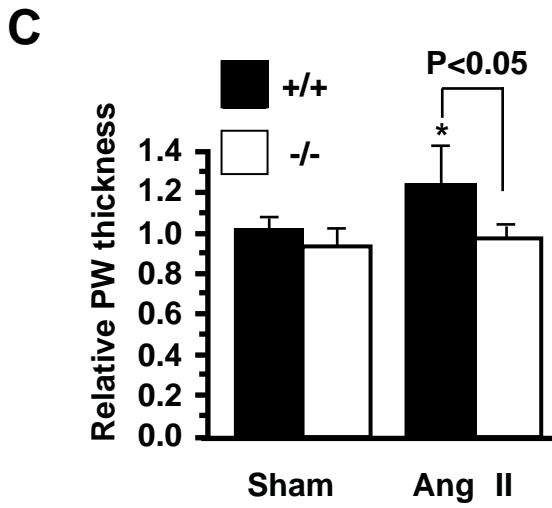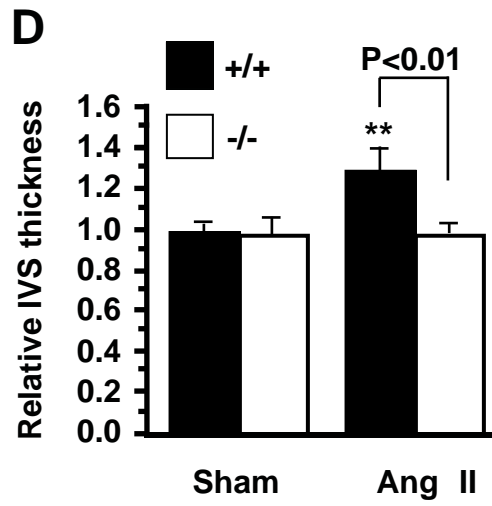

**Supplemental Figure 1**

Supplemental Figure 1. Reduced Cardiac Hypertrophy in Ets-1 <sup>-/-</sup> after Ang II infusion. (A) **Comparison of representative transverse cross sections through the heart in Ets-1<sup>+/+</sup> and Ets-1<sup>-/-</sup> mice after Ang II infusion for 1 week compared to Sham controls. Original magnification X2. (B-D) Comparison of heart weight (B) after one week of Ang II infusion, posterior wall (PW) thickness after Ang II infusion for 1 week (C) and intraventricular septal (IVS) thickness after Ang II infusion for 1 week (D). \* p < 0.05, \*\* p < 0.01 vs. sham of Ets-1<sup>+/+</sup>. Values represent mean±SEM, n=7.**
